# Supplementary material for: Nurse in limbo: A qualitative study of nursing in disasters in Iranian context
Source: PubMed Central journal article supplement (PMC5536275; doi:10.1371/journal.pone.0181314), 2017-07-31
Supplement: pone.0181314.s003.pdf [file pone.0181314.s003.pdf]

---

## EDITORIAL CERTIFICATE LETTER

---

This letter is to certify that this organization employs only native English-speaking citizens of English-speaking countries as editors of academic articles. **EnglishEdit.ir** certifies that the text of the article mentioned below has been edited by a native English speaker with appropriate experience and qualifications for proper English language, grammar, punctuation, spelling, and overall style.

The substantive content of the article mentioned below remains the full responsibility of the author/authors:

TITLE OF ARTICLE:

NURSE IN LIMBO: A QUALITATIVE STUDY OF DISASTER NURSING IN IRAN

AUTHOR(S):

NEGAR, POURVAKHSHOORI .PHD CANDIDATE, KIAN, NOROUZI. PHD , FAZLOLLAH, AHMADI . PHD , MOHAMMADALI, HOSSEINI. PHD , HAMIDREZA, KHANKEH . PHD

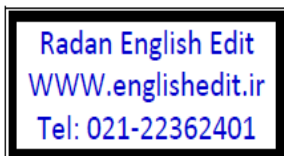

B. Radan  
Radan English Edit  
Head of Institute

---

This certificate may be verified at [www.Radanenglishedit.com](http://www.Radanenglishedit.com)  
Documents receiving this certification should be English-ready for publication; however, the author has the ability to accept or reject our suggestions and changes.  
[www.Radanenglishedit.com](http://www.Radanenglishedit.com) ; [englishedit.ir@gmail.com](mailto:englishedit.ir@gmail.com)  
No. 10, Shabnam St., Jamshidi St. Saadat Abad, Tehran, Iran  
Tel: +98 -21-22362401; 0910-201-3545
